# Supplementary material
Source: PubMed Central journal article supplement (PMC6104824)
Supplement: joces-131-217257-s1.pdf [file joces-131-217257-s1.pdf]

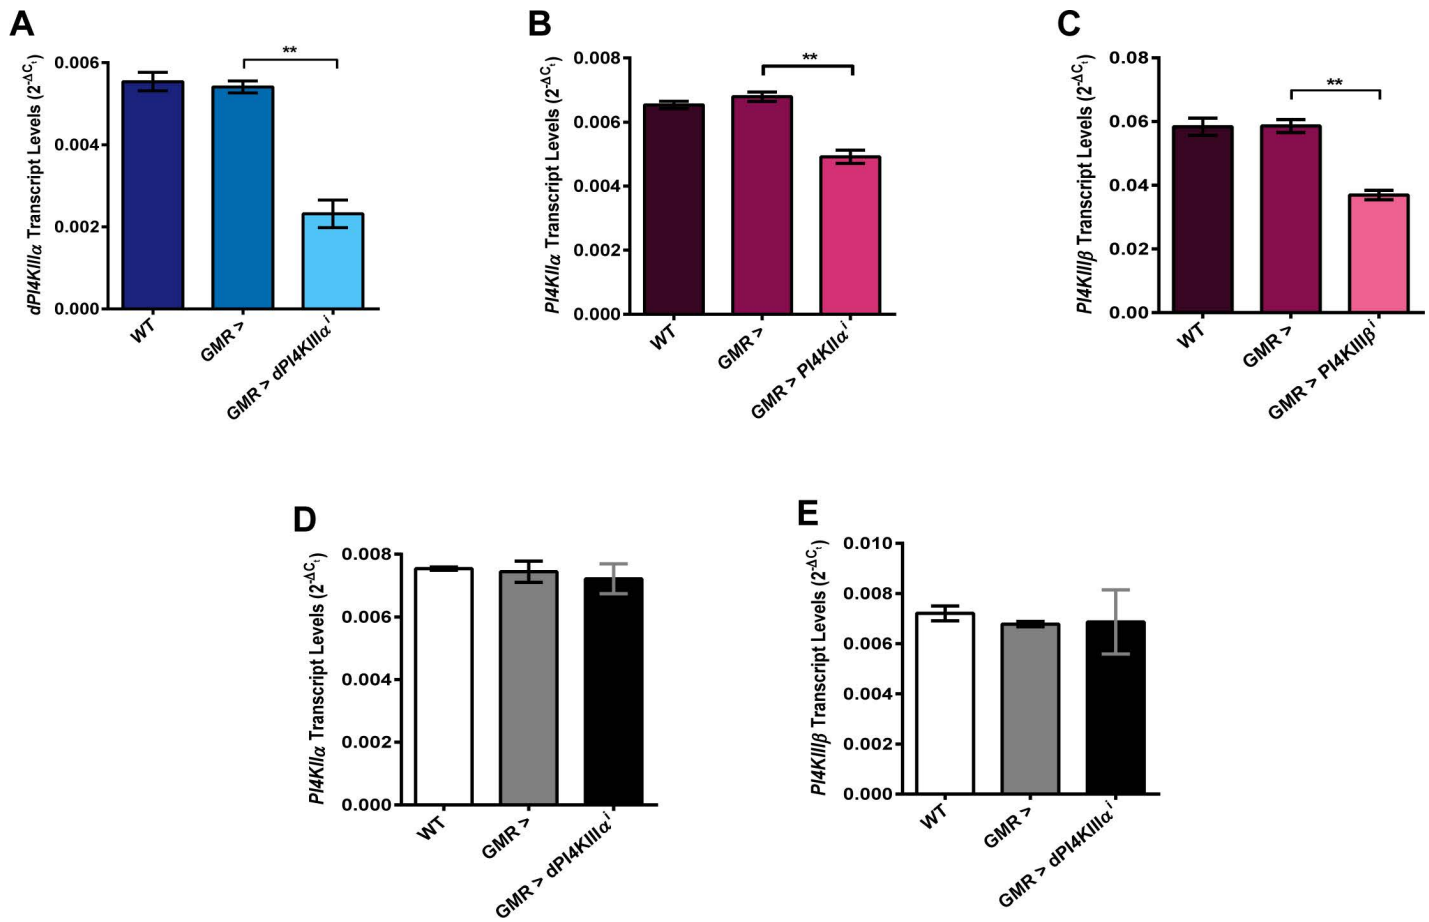

Figure S1: Q-PCR analysis of transcript depletion in transgenic RNAi manipulations

A) - E) Quantitative PCR (Q-PCR) from retinal tissue of genotypes indicated. Detected transcript, normalized to the house keeping transcript RP49, is indicated on y-axis. n=75retinae per sample(\*\* -  $p < 0.01$ , two-tailed unpaired t-test).The experiment has been repeated two times, one of the trials is shown here.

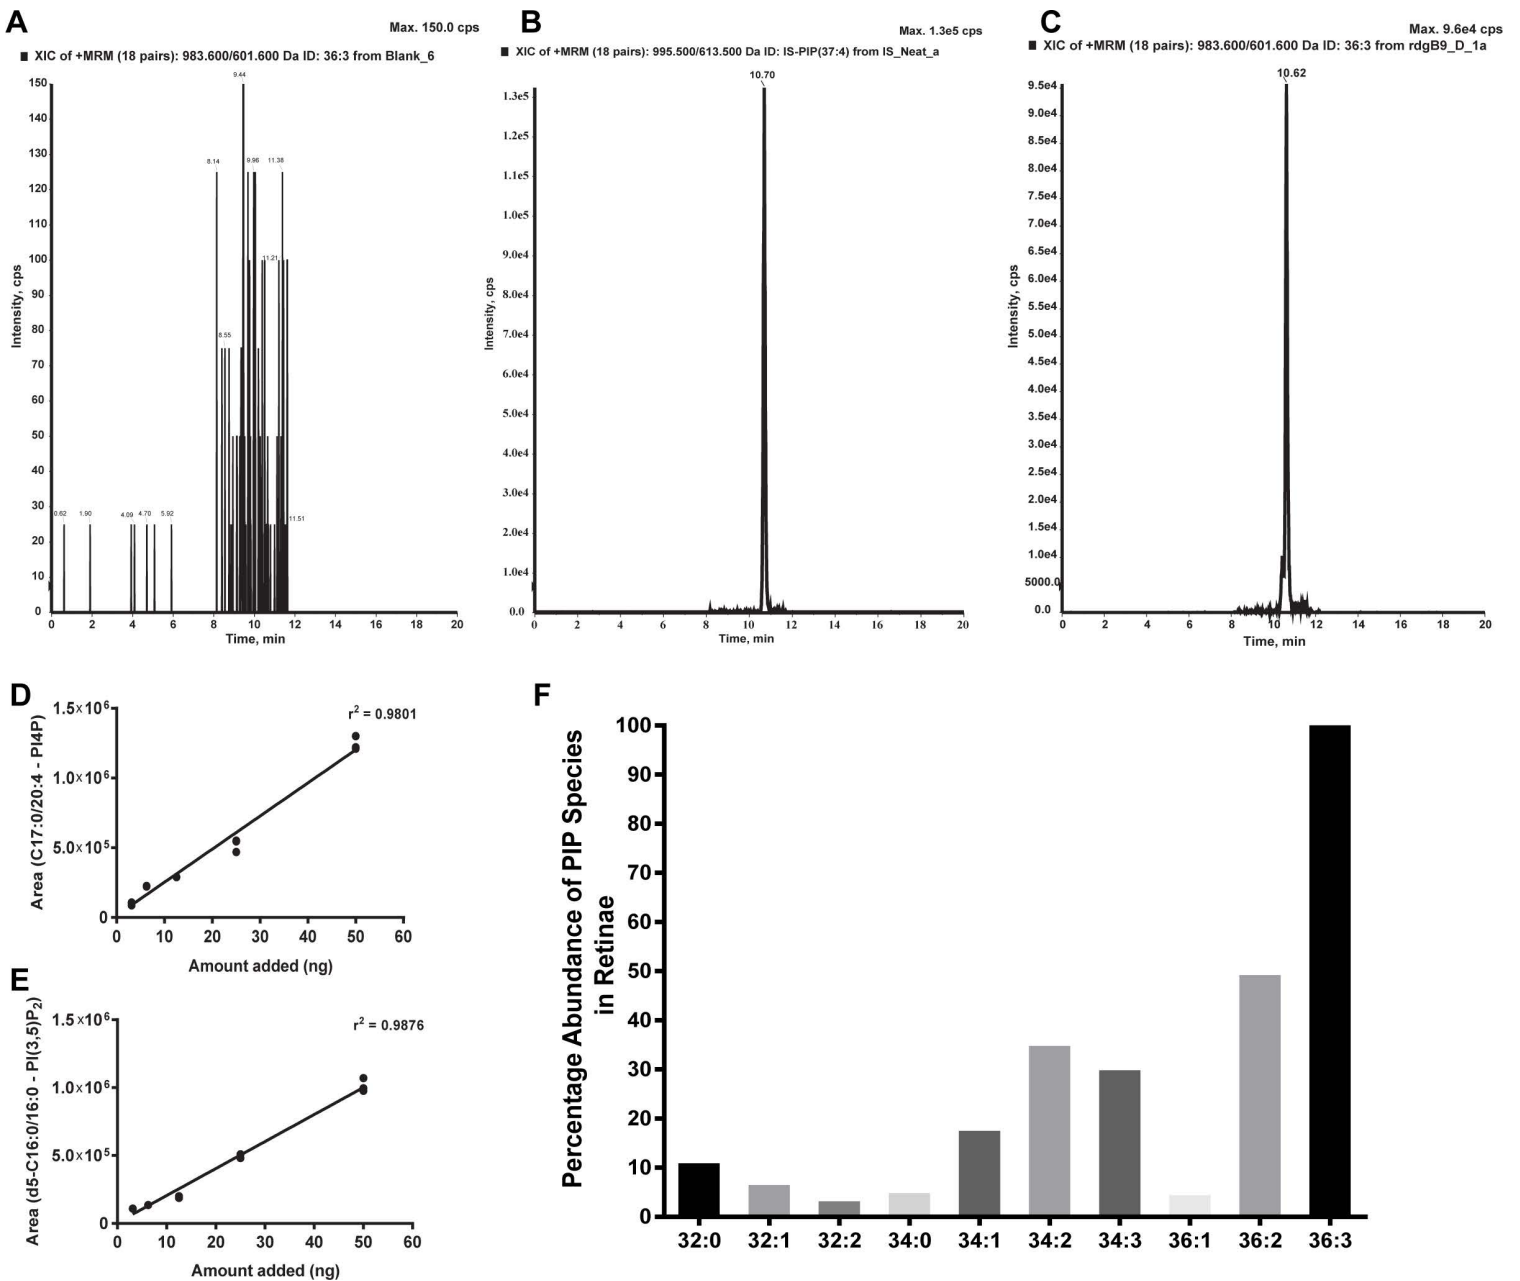

**Figure S2: LC-MS analysis of PIP and PIP<sub>2</sub> levels in retinal lipid extracts**

A) - C) Representative chromatograms of blank, synthetic internal standard (C<sub>17:0/20:4</sub>-PI<sub>4</sub>P) and retinal lipid extract (36:3-PIP) respectively. The 36:3 PIP elutes at 10.62 mins, which is not observed in the chromatograms from blank injections. X-axis is elution time; y-axis is signal in counts per second.

D) and E) Response linearity curves for extracted internal standards C<sub>17:0/20:4</sub>-PI<sub>4</sub>P and d<sub>5</sub>-C<sub>16:0/16:0</sub>-PI(3,5)P<sub>2</sub>, respectively. X-axis represents amount added before extraction; y-axis represents area under curve for the peak being quantified.

F) Representation of the acyl chain length and desaturation of PIP species extracted and detected from *Drosophila* retinae. X-axis represents the species detected from wild type *Drosophila* retinae in the format a:b where a is the combined acyl chain length of *sn-1* and *sn-2* and b is the number of double bonds in both acyl chains. Y-axis represents the relative abundance of each species. The PIP species 36:3 is most abundant with 36:2, the next most abundant species, being the about 50% of the levels of 36:3.

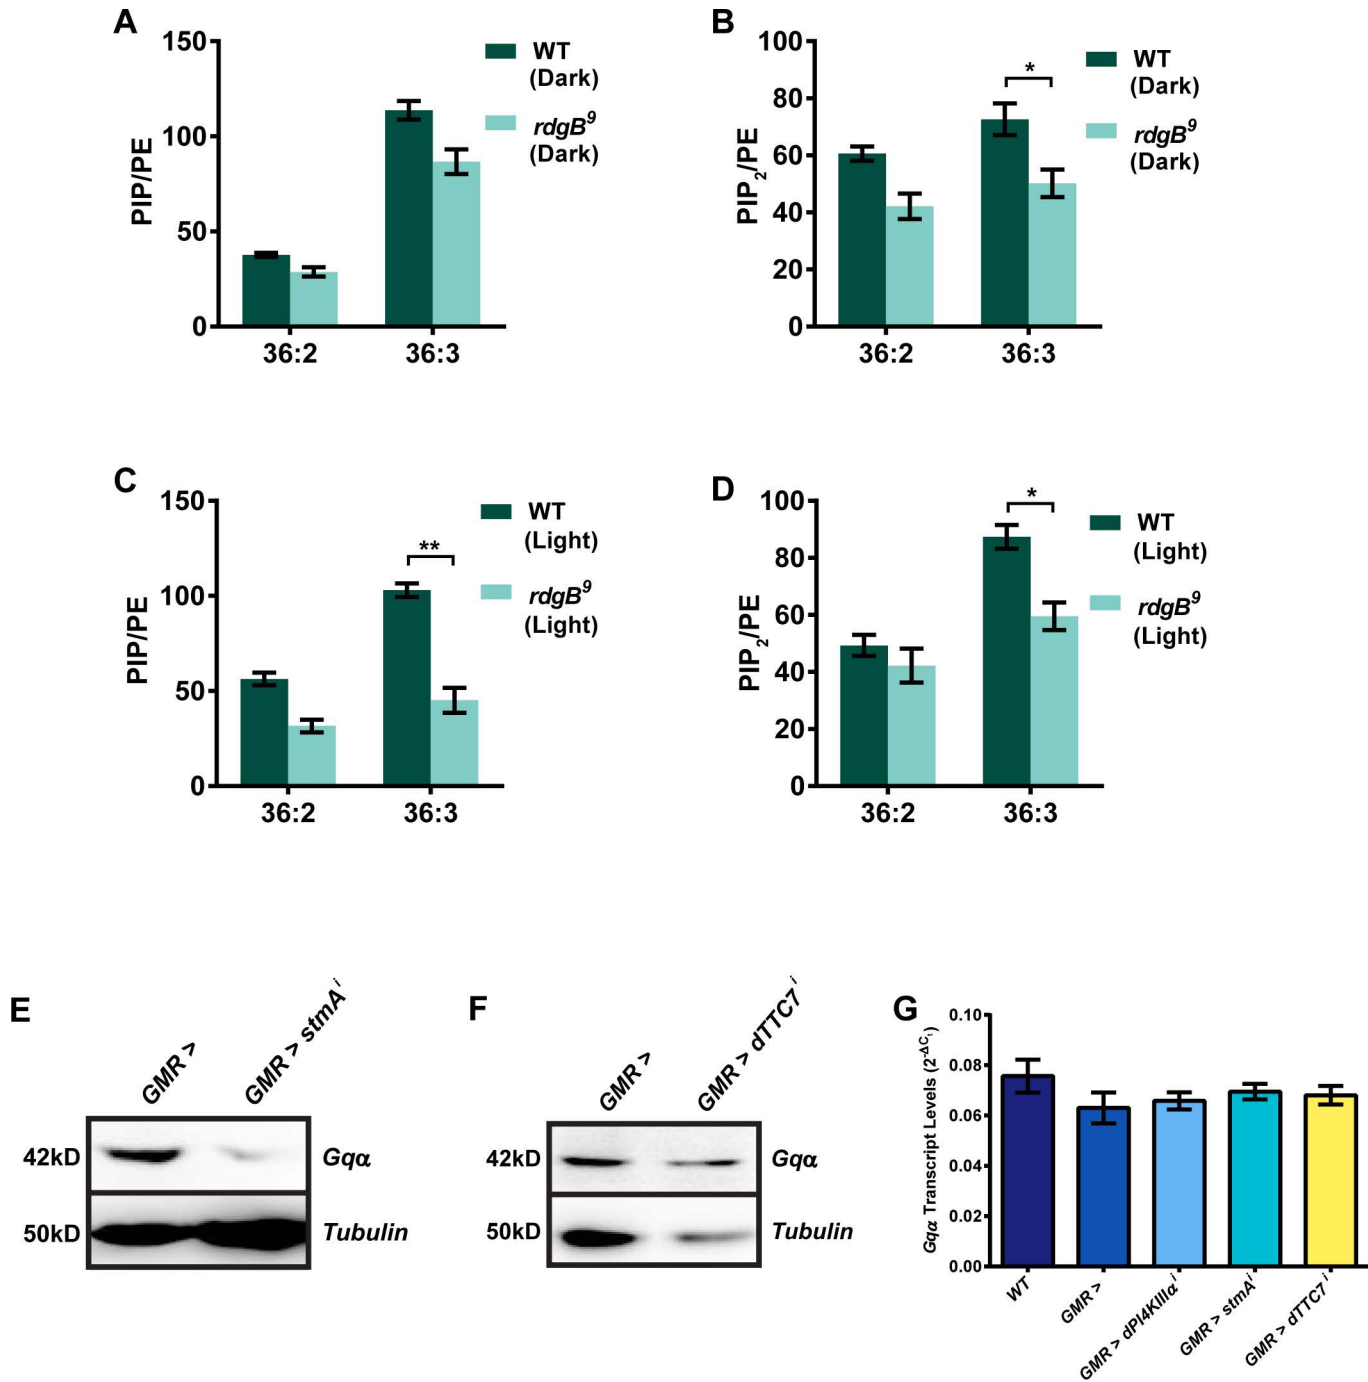

Figure S3: LC-MS measurements of lipids from *rdgB*<sup>9</sup> flies

A) and B) LC-MS measurement of total PIP and PIP<sub>2</sub> levels, respectively, from retinæ of one day old WT and *rdgB*<sup>9</sup> flies. Flies were reared and processed completely in dark. Levels for the two most abundant molecular species of PIP and PIP<sub>2</sub> [36:2 and 36:3] are shown. Y-axis represents PIP and PIP<sub>2</sub> levels normalized to phosphatidylethanolamine (PE). Values are mean ± s.e.m., n=25 retinæ per sample (\* - p < 0.05, ANOVA followed by Tukey's multiple comparison test). The experiment has been repeated three times, one of the trials is shown here.

- C) and D) LC-MS measurement of total PIP and PIP<sub>2</sub> levels, respectively, from retinae of one day old WT and *rdgB* flies. Flies were reared in dark and exposed to one minute of bright illumination before processing. Y-axis represents PIP and PIP<sub>2</sub> levels normalized to phosphatidylethanolamine (PE). Levels for the two most abundant molecular species of PIP and PIP<sub>2</sub> [36:2 and 36:3] are shown. Values are mean  $\pm$  s.e.m., n=25 retinae per sample (\* - p < 0.05, \*\* - p < 0.01, ANOVA followed by Tukey's multiple comparison test). The experiment has been repeated three times, one of the trials is shown here.
- E) and F) Western blot of head extracts made from flies of the indicated genotypes. Tubulin is used as a loading control, genotypes are indicated above.
- G) Quantitative PCR (Q-PCR) from retinal tissue of genotypes indicated. Detected transcript normalized to the house keeping transcript RP49 is indicated on y-axis. n=75 retinae per sample.

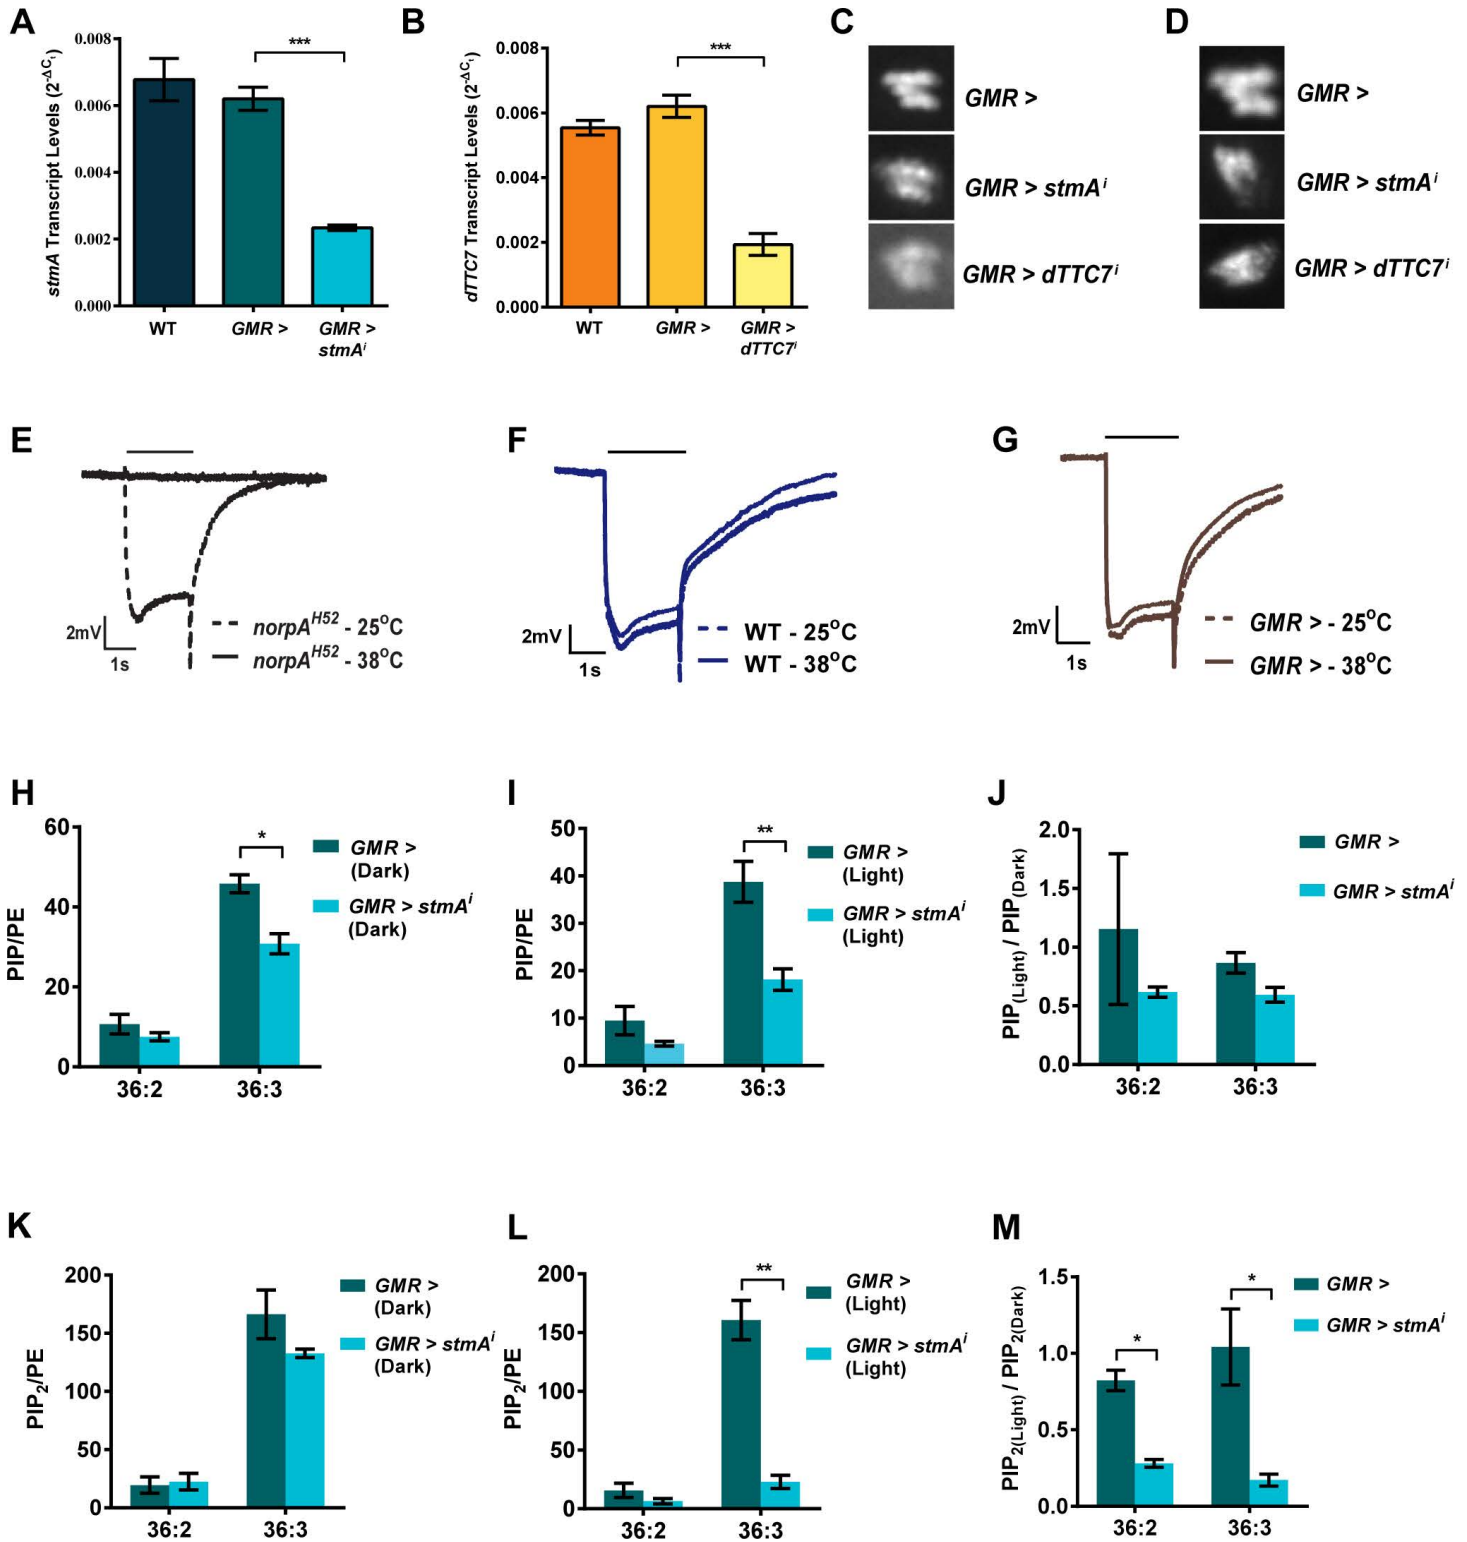

Figure S4: *stmA* is required for maintenance of PIP and PIP<sub>2</sub> levels in photoreceptors

A) - B) Quantitative PCR (Q-PCR) from retinal tissue of genotypes indicated. Detected transcript, normalized to the house keeping transcript RP49, is indicated on y-axis. n=75 retinae per sample (\*\*\*) -  $p < 0.001$ , two-tailed unpaired t-test).

- C) Representative images of fluorescent deep pseudopupil from one day old flies expressing the P4M::GFP probe, genotype as indicated.
- D) Representative images of fluorescent deep pseudopupil from flies expressing the PLC $\delta$ PH::GFP probe, genotype as indicated.
- E) – G) Representative electroretinogram (ERG) trace of one day old flies, genotype as indicated. X-axis is time in (s); y-axis is amplitude in mV. Black bar above traces indicates duration of the light stimulus. The experiment has been repeated two times, one of the trials is shown here.
- H) and K) LC-MS measurement of total PIP and PIP<sub>2</sub> levels, respectively, from retinæ of one day old flies, genotypes as indicated. Flies were reared and processed completely in dark. Levels for the two most abundant molecular species of PIP and PIP<sub>2</sub> [36:2 and 36:3] are shown. Y-axis represents PIP and PIP<sub>2</sub> levels normalized to phosphatidylethanolamine (PE). Values are mean  $\pm$ s.e.m., n=25 retinæ per sample (\* - p < 0.05, ANOVA followed by Tukey's multiple comparison test).
- I) and L) LC-MS measurement of total PIP and PIP<sub>2</sub> levels, respectively, from retinæ of one day old flies, genotypes as indicated. Flies were reared in dark and exposed to one minute of bright illumination before processing. Y-axis represents PIP and PIP<sub>2</sub> levels normalized to phosphatidylethanolamine (PE). Levels for the two most abundant molecular species of PIP and PIP<sub>2</sub> [36:2 and 36:3] are shown. Values are mean  $\pm$ s.e.m., n=25 retinæ per sample (\*\* - p < 0.01, ANOVA followed by Tukey's multiple comparison test).
- J) and M) LC-MS measurement of total PIP and PIP<sub>2</sub> levels, respectively, from retinæ of one day old flies, genotypes as indicated. The y-axis represents a ratio of lipid levels, [PIP<sub>(light)</sub>/PIP<sub>(dark)</sub>] and [PIP<sub>2(light)</sub>/PIP<sub>2(dark)</sub>]. Ratios for the two most abundant molecular species of PIP and PIP<sub>2</sub> [36:2 and 36:3] are shown. A reduction in the ratio indicates a drop in the levels of PIP and PIP<sub>2</sub>. Values are mean  $\pm$  s.e.m. (\* - p < 0.05, \*\* - p < 0.01, ANOVA followed by Tukey's multiple comparison test).

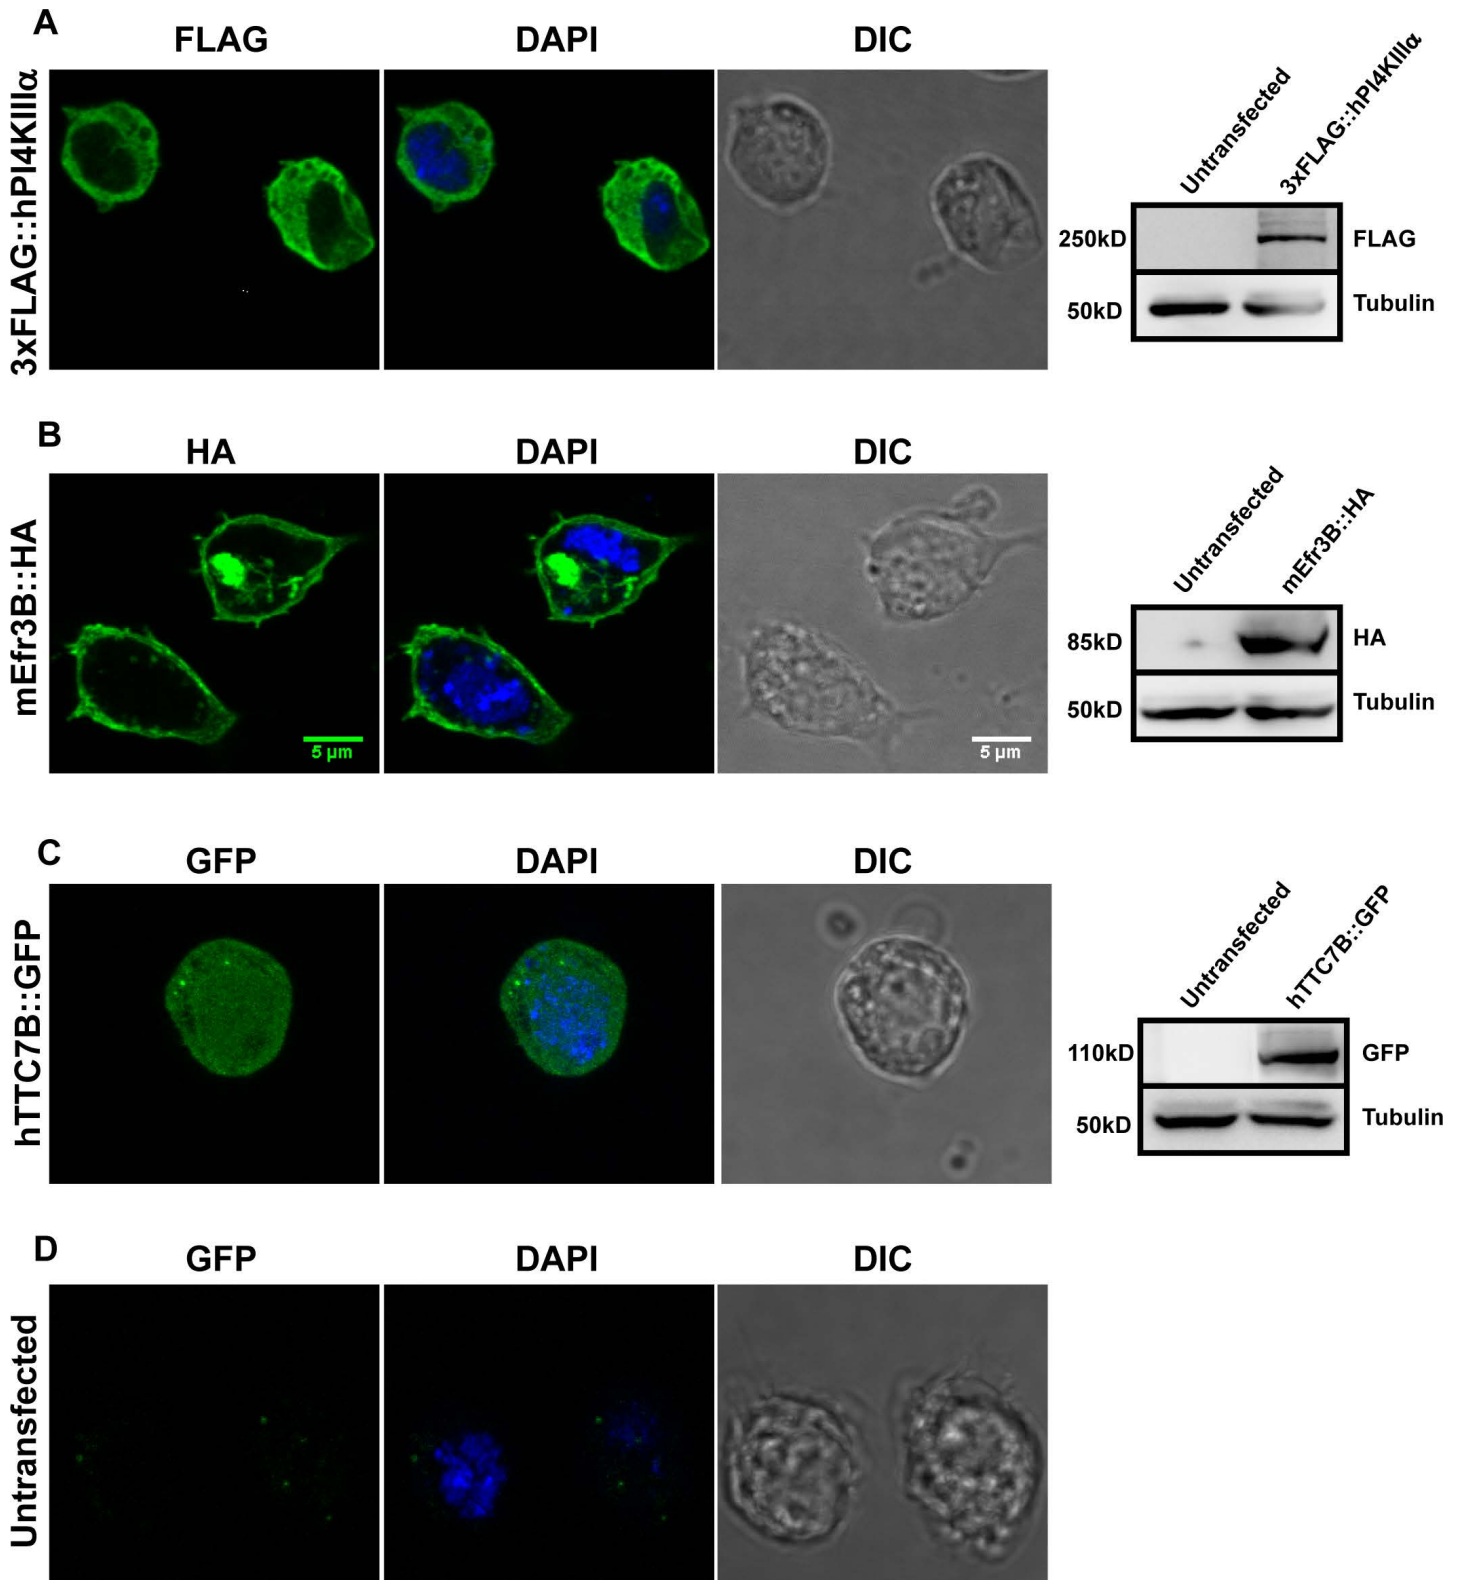

Figure S5: Localization of mammalian PI4KIII $\alpha$ , Efr3 and TTC7 in S2R+ cells

A) Confocal images of S2R+ cells transfected with pUAST-3xFLAG::hPI4KIII $\alpha$ , followed by staining with DAPI and  $\alpha$ -FLAG. Blue represents DAPI, which marks the nucleus, and green represents FLAG. Western blot indicates the presence of the FLAG-tagged protein in transfected cells. Scale bar - 5  $\mu$ m. The experiment has been repeated two times, one of the trials is shown here.



- B) Confocal images of S2R+ cells transfected with pUAST-mEfr3B::HA followed by staining with DAPI and  $\alpha$ -HA. Blue represents DAPI, which marks the nucleus, and green represents HA. Western blot indicates the presence of the HA-tagged protein in transfected cells. Scale bar - 5 $\mu$ m. The experiment has been repeated two times, one of the trials is shown here.
- C) Confocal images of S2R+ cells transfected with pUAST-hTTC7B::GFP, followed by staining with DAPI. Blue represents DAPI, which marks the nucleus, and green represents GFP. Western blot indicates the presence of the GFP-tagged protein in transfected cells. Scale bar - 5 $\mu$ m. The experiment has been repeated two times, one of the trials is shown here.
- D) Confocal images of untransfected S2R+ cells followed by staining with DAPI. Blue represents DAPI, which marks the nucleus, and green represents GFP. Scale bar - 5 $\mu$ m.

**Table S1: Conditions for LC separation Solvent A: Water + 0.1% Formic Acid; Solvent B: Acetonitrile. Gradient:**

| <b>Time (min)</b> | <b>Flow Rate</b> | <b>%A</b> | <b>%B</b> |
|-------------------|------------------|-----------|-----------|
| 0                 | 0.1              | 55        | 45        |
| 5                 | 0.1              | 55        | 45        |
| 10                | 0.1              | 0         | 100       |
| 15                | 0.1              | 0         | 100       |
| 16                | 0.1              | 55        | 45        |
| 20                | 0.1              | 55        | 45        |

## Table S2: MRM details

MRMs:

Polarity: Positive; Ion Source: Turbo Spray Ion Drive; Resolution Q1: Unit; Resolution Q3: Unit

| Q1 Mass (Da) | Q3 Mass (Da) | Dwell Time (ms) | Species                                   |
|--------------|--------------|-----------------|-------------------------------------------|
| 809.4        | 535.4        | 60              | IS – PI (17:0/14:1)                       |
| 823.5        | 549.5        | 60              | PI - 32:2                                 |
| 849.5        | 575.5        | 60              | PI - 34:2                                 |
| 851.6        | 577.6        | 60              | PI - 34:3                                 |
| 877.5        | 603.6        | 60              | PI - 36:2                                 |
| 879.6        | 605.6        | 60              | PI - 36:3                                 |
| 938.5        | 556.4        | 60              | IS - PI4P (17:0/20:4)                     |
| 957.5        | 575.5        | 60              | PIP - 34:2                                |
| 959.5        | 577.5        | 60              | PIP - 34:3                                |
| 985.6        | 603.6        | 60              | PIP - 36:2                                |
| 987.6        | 605.6        | 60              | PIP - 36:3                                |
| 1046.5       | 556.4        | 60              | IS – d5-PI(3,5)P <sub>2</sub> (16:0/16:0) |
| 1065.5       | 575.5        | 60              | PIP <sub>2</sub> - 34:2                   |
| 1067.5       | 577.5        | 60              | PIP <sub>2</sub> - 34:3                   |
| 1093.6       | 603.6        | 60              | PIP <sub>2</sub> - 36:2                   |
| 1095.6       | 605.6        | 60              | PIP <sub>2</sub> - 36:3                   |
| 690.5        | 535.5        | 60              | IS – PE (17:0/14:1)                       |
| 754.4        | 601.4        | 60              | PE - 34:2                                 |
| 752.5        | 603.5        | 60              | PE - 34:3                                 |
| 732.5        | 577.5        | 60              | PE - 36:2                                 |
| 730.4        | 575.4        | 60              | PE - 36:3                                 |
